# Supplementary material for: Different Responses of Bacteria and Archaea to Environmental Variables in Brines of the Mahai Potash Mine, Qinghai-Tibet Plateau
Source: MDPI journal article supplement (doi:10.3390/microorganisms11082002), 2023-08-03
Supplement: s1 [file s1]

**Table S1.** Primers used in the amplification of the amplicons.

| Primer name | Predicted target group | Target region | Primer sequences (5'→3') |
|-------------|------------------------|---------------|--------------------------|
| 515F        | Bacterial 16S rRNA     | 16S (V4+V5)   | GTGCCAGCMGCCGCGGTAA      |
| 907R        |                        |               | CCGTCAATTCCTTTGAGTTT     |
| Arch519F    | Archaeal 16S rRNA      | 16S (V4+V5)   | CAGCCGCCGCGGTAA          |
| Arch915R    |                        |               | GTGCTCCCCCGCCAATTCCT     |

**Table S2.** Ionic chromatography analysis of brine samples from the Mahai potash area.

| Sample ID   | Anion concentrations (mg/L) |                 |                              |                               | Cation concentrations (mg/L) |                 |                |                  |                  |
|-------------|-----------------------------|-----------------|------------------------------|-------------------------------|------------------------------|-----------------|----------------|------------------|------------------|
|             | F <sup>-</sup>              | Cl <sup>-</sup> | NO <sub>3</sub> <sup>-</sup> | SO <sub>4</sub> <sup>2-</sup> | Li <sup>+</sup>              | Na <sup>+</sup> | K <sup>+</sup> | Mg <sup>2+</sup> | Ca <sup>2+</sup> |
| <b>ML</b>   | 15003.43                    | 4276.634        | 14849.78                     | 15388.2                       | 0                            | 1752.437        | 1156.231       | 2951.274         | 3733.006         |
| <b>MSa</b>  | 15008.67                    | 157422.2        | 14876.42                     | 21660.88                      | 1048.775                     | 68474.23        | 6127.609       | 17129.66         | 3958.655         |
| <b>MSb</b>  | 15007.13                    | 143291.8        | 14863.43                     | 19374.23                      | 1048.055                     | 57633.01        | 5589.147       | 14234.05         | 4108.269         |
| <b>MWa1</b> | 14962.57                    | 183747.7        | 15534.06                     | 16970.09                      | 1076.868                     | 58005.92        | 8780.301       | 19554.33         | 4054.31          |
| <b>MWa2</b> | 14955.03                    | 172267.5        | 15829.08                     | 16849.51                      | 1049.496                     | 55424.79        | 1176.33        | 18605.3          | 4034.688         |
| <b>MWa3</b> | 14962.95                    | 168074.3        | 15391.88                     | 16547.81                      | 1049.496                     | 58640.92        | 8049.893       | 18693.78         | 4024.877         |
| <b>MWa4</b> | 14959.25                    | 192179.7        | 15489.77                     | 17130.95                      | 1048.055                     | 82309.46        | 2485.351       | 7152.701         | 3936.58          |
| <b>MWb1</b> | 14959.25                    | 180899.7        | 15684.24                     | 16003.92                      | 1055.979                     | 47078.67        | 9141.08        | 29525.59         | 4145.06          |
| <b>MWb2</b> | 14957.33                    | 175603.9        | 15531.06                     | 15986.73                      | 1047.335                     | 92249.42        | 1932.177       | 4700.917         | 4120.533         |
| <b>MWb3</b> | 14960.27                    | 179258.3        | 15376.22                     | 16023.42                      | 1046.615                     | 88844.11        | 1864.635       | 4548.216         | 4248.073         |
| <b>MWb4</b> | 14961.03                    | 138688.1        | 15445.49                     | 16619.9                       | 1046.615                     | 90848.92        | 1898.611       | 4750.866         | 4113.174         |
| <b>MWc1</b> | 14959.89                    | 205499.2        | 15479.12                     | 17161.22                      | 1049.496                     | 48882.24        | 2747.478       | 13967.18         | 4005.256         |
| <b>MWc2</b> | 14961.93                    | 203283.7        | 15533.39                     | 16996.01                      | 1057.419                     | 39564.63        | 23382.91       | 32715.19         | 5032.936         |
| <b>MWc3</b> | 14963.08                    | 215179.1        | 15704.88                     | 16861.83                      | 1059.58                      | 27149.8         | 18638.06       | 39640.98         | 4652.768         |
| <b>MWc4</b> | 14967.29                    | 222592          | 15613.64                     | 16735.35                      | 1062.461                     | 21301.77        | 20484.29       | 46138.63         | 4319.201         |
| <b>MWc5</b> | 14961.67                    | 227679.6        | 15637.95                     | 16687.12                      | 1079.029                     | 17609.27        | 19754.47       | 48784.51         | 3845.83          |
| <b>MWd1</b> | 14958.61                    | 172371.6        | 14819.47                     | 16569.36                      | 1046.615                     | 83249.3         | 2458.557       | 7272.579         | 3880.168         |
| <b>MWd2</b> | 14989.38                    | 176794.6        | 14877.41                     | 16812.57                      | 1046.615                     | 92986.42        | 2671.437       | 7866.259         | 3858.094         |
| <b>MWd3</b> | 14989.89                    | 175264.2        | 14877.08                     | 16769.21                      | 1046.615                     | 91957.87        | 2638.044       | 7830.581         | 3855.641         |
| <b>MWd4</b> | -                           | -               | -                            | -                             | -                            | -               | -              | -                | -                |
| <b>MWe1</b> | 14958.61                    | 175545.6        | 15335.27                     | 17437.27                      | 1047.335                     | 83295.61        | 3731.664       | 8972.273         | 3811.493         |
| <b>MWe2</b> | 14961.29                    | 187086.4        | 15415.52                     | 17260.77                      | 1056.699                     | 36162.6         | 4862.85        | 35325.38         | 4412.404         |
| <b>MWe3</b> | 14960.27                    | 189577.6        | 15457.14                     | 16784.35                      | 1064.622                     | 9152.159        | 2913.536       | 50606.93         | 4221.093         |
| <b>MWe4</b> | 14960.14                    | 213275.8        | 15428.17                     | 17000.88                      | 1067.504                     | 13039.69        | 3201.55        | 55633.23         | 4417.309         |

“-”: data not aquired

**Table S3.** Sequence data of the 24 water samples.

| Sample ID    | No. of effective sequence |         | No. of assigned ASVs |         |
|--------------|---------------------------|---------|----------------------|---------|
|              | Bacteria                  | Archaea | Bacteria             | Archaea |
| <b>ML</b>    | 76051                     | 104     | 727                  | 34      |
| <b>MSa</b>   | 74985                     | 14020   | 640                  | 60      |
| <b>MSb</b>   | 74803                     | 17732   | 1211                 | 60      |
| <b>MWa1</b>  | 75970                     | n.d.    | 1515                 | n.d.    |
| <b>MWa2</b>  | 75853                     | 20893   | 766                  | 114     |
| <b>MWa3</b>  | 75403                     | 33230   | 1379                 | 143     |
| <b>MWa4</b>  | 74458                     | 1487    | 1294                 | 79      |
| <b>MWb1</b>  | 76061                     | 2044    | 924                  | 10      |
| <b>MWb2</b>  | 75936                     | 737     | 1215                 | 42      |
| <b>MWb3</b>  | 75957                     | 2365    | 759                  | 47      |
| <b>MWb4</b>  | 76001                     | 10      | 886                  | 6       |
| <b>MWc1</b>  | 75673                     | 1827    | 1220                 | 73      |
| <b>MWc2</b>  | 76032                     | 37199   | 476                  | 128     |
| <b>MWc3</b>  | 75735                     | n.d.    | 2132                 | n.d.    |
| <b>MWc4</b>  | 75984                     | 12345   | 1688                 | 77      |
| <b>MWc5</b>  | 75917                     | 5308    | 689                  | 73      |
| <b>MWd1</b>  | 74902                     | 46018   | 875                  | 104     |
| <b>MWd2</b>  | 74578                     | 40810   | 677                  | 99      |
| <b>MWd3</b>  | 75250                     | 4464    | 694                  | 64      |
| <b>MWd4</b>  | 75498                     | 162     | 734                  | 43      |
| <b>MWe1</b>  | 51246                     | 14839   | 138                  | 38      |
| <b>MWe2</b>  | 75686                     | 3978    | 2308                 | 12      |
| <b>MWe3</b>  | 75965                     | 48      | 2014                 | 12      |
| <b>MWe4</b>  | 75906                     | 92      | 96                   | 5       |
| <b>Total</b> | 1789850                   | 259712  | 3980                 | 238     |

“n.d.”: not determined.

**Table S4.** Alpha diversity indices calculated for each sample.

| <b>Sample ID</b> | <b>Bacteria</b> |          |          |            | <b>Archaea</b> |          |          |            |
|------------------|-----------------|----------|----------|------------|----------------|----------|----------|------------|
|                  | Richness        | Chao1    | Shannon  | Invsimpson | Richness       | Chao1    | Shannon  | Invsimpson |
| <b>ML</b>        | 727             | 1092.956 | 2.932158 | 5.582196   | 34             | 45.375   | 3.128652 | 16.09524   |
| <b>MSa</b>       | 640             | 953.5119 | 2.803248 | 3.675312   | 60             | 61.5     | 3.053482 | 17.4974    |
| <b>MSb</b>       | 1211            | 1639.879 | 3.395878 | 4.133344   | 60             | 77.5     | 3.112409 | 16.87359   |
| <b>MWa1</b>      | 1515            | 1990.02  | 1.896605 | 2.047005   | n.d.           | n.d.     | n.d.     | n.d.       |
| <b>MWa2</b>      | 766             | 1197.462 | 1.680828 | 2.319119   | 114            | 124.0435 | 1.654676 | 3.993343   |
| <b>MWa3</b>      | 1379            | 1826.857 | 2.164484 | 2.310101   | 143            | 151.6364 | 2.058047 | 3.600064   |
| <b>MWa4</b>      | 1294            | 1753.722 | 2.213416 | 2.393925   | 79             | 92.125   | 2.563019 | 5.445116   |
| <b>MWb1</b>      | 924             | 1438.857 | 1.715922 | 2.446089   | 10             | 10.5     | 0.736642 | 2.011404   |
| <b>MWb2</b>      | 1215            | 1682.708 | 2.813704 | 4.689674   | 42             | 49.33333 | 1.6573   | 2.860305   |
| <b>MWb3</b>      | 759             | 1155.409 | 1.655671 | 1.963726   | 47             | 57.90909 | 1.873157 | 4.541625   |
| <b>MWb4</b>      | 886             | 1281.189 | 1.93874  | 2.901035   | 6              | 7        | 1.695743 | 5          |
| <b>MWc1</b>      | 1220            | 1623.077 | 3.101065 | 3.885334   | 73             | 108.4286 | 2.48619  | 7.669186   |
| <b>MWc2</b>      | 476             | 799.0182 | 0.756326 | 1.232442   | 128            | 139.4    | 1.895657 | 3.497383   |
| <b>MWc3</b>      | 2132            | 2502.722 | 3.968302 | 5.415725   | n.d.           | n.d.     | n.d.     | n.d.       |
| <b>MWc4</b>      | 1688            | 2038.833 | 3.324904 | 5.010013   | 77             | 98.66667 | 2.108946 | 4.907463   |
| <b>MWc5</b>      | 689             | 1084.116 | 1.871529 | 2.279554   | 73             | 90.76923 | 1.832427 | 4.431009   |
| <b>MWd1</b>      | 875             | 1218.994 | 2.616186 | 4.732894   | 104            | 107.9286 | 3.391756 | 24.19337   |
| <b>MWd2</b>      | 677             | 975.8095 | 2.010944 | 2.499024   | 99             | 108.5455 | 3.508113 | 27.84231   |
| <b>MWd3</b>      | 694             | 1001.616 | 2.278593 | 2.298387   | 64             | 89       | 1.304112 | 2.641113   |
| <b>MWd4</b>      | 734             | 1118.57  | 2.511628 | 2.516322   | 43             | 54.375   | 3.419129 | 23.18375   |
| <b>MWe1</b>      | 138             | 159      | 3.915377 | 16.13991   | 38             | 38       | 2.81223  | 11.06877   |
| <b>MWe2</b>      | 2308            | 2591.53  | 4.24077  | 7.103093   | 12             | 13.5     | 1.672916 | 4.828518   |
| <b>MWe3</b>      | 2014            | 2379.889 | 4.099533 | 8.00471    | 12             | 33       | 1.995844 | 5.788945   |
| <b>MWe4</b>      | 96              | 129      | 1.746239 | 2.073854   | 5              | 6        | 0.470767 | 1.252071   |

“n.d.”: not determined.

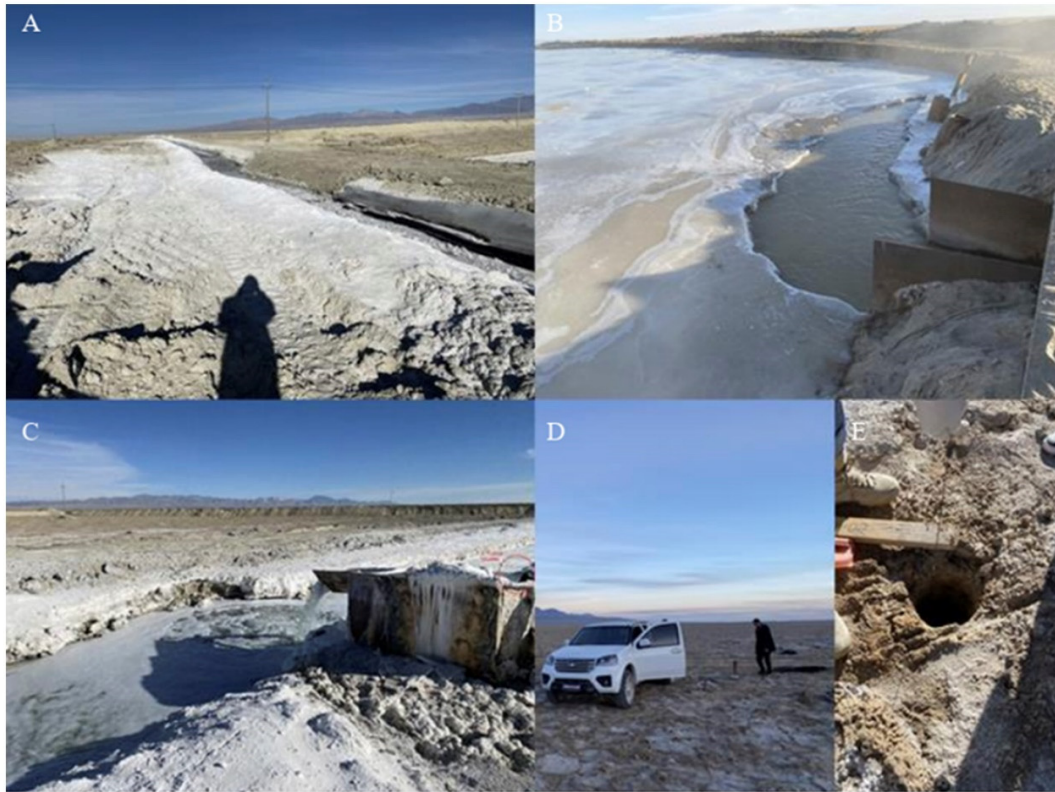

**Figure S1.** Sampling context. (A) The panorama of the Mahai potash area. (B) Mahai lake. (C) Monitoring station. (D) Sampling site of a Mining well. (E) Brine sampling from a mining well.

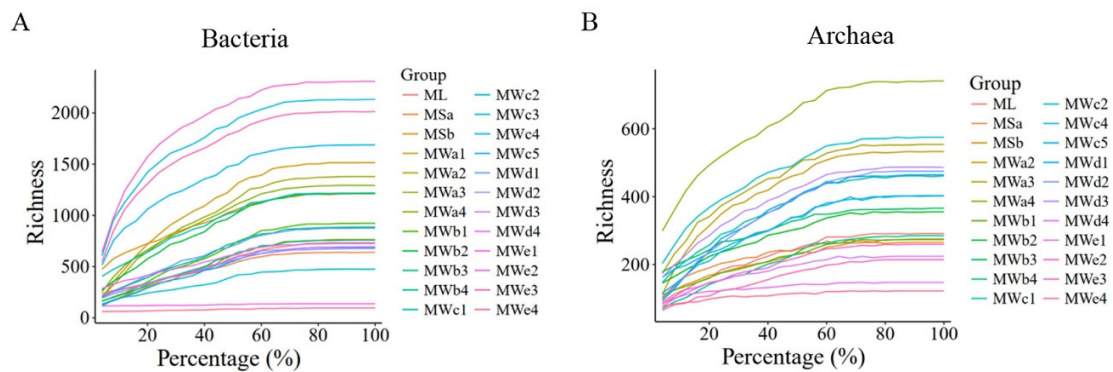

**Figure S2.** Rarefaction analysis of bacteria (A) and archaea (B) amplicon obtained from different brine samples of the Mahai potash region.

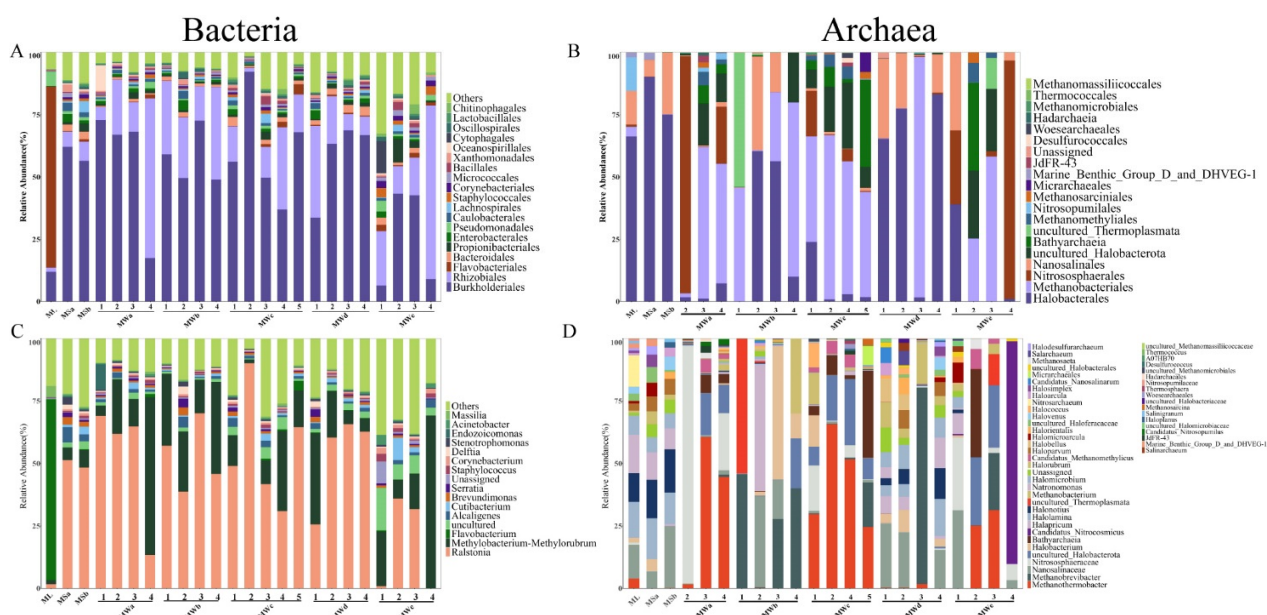

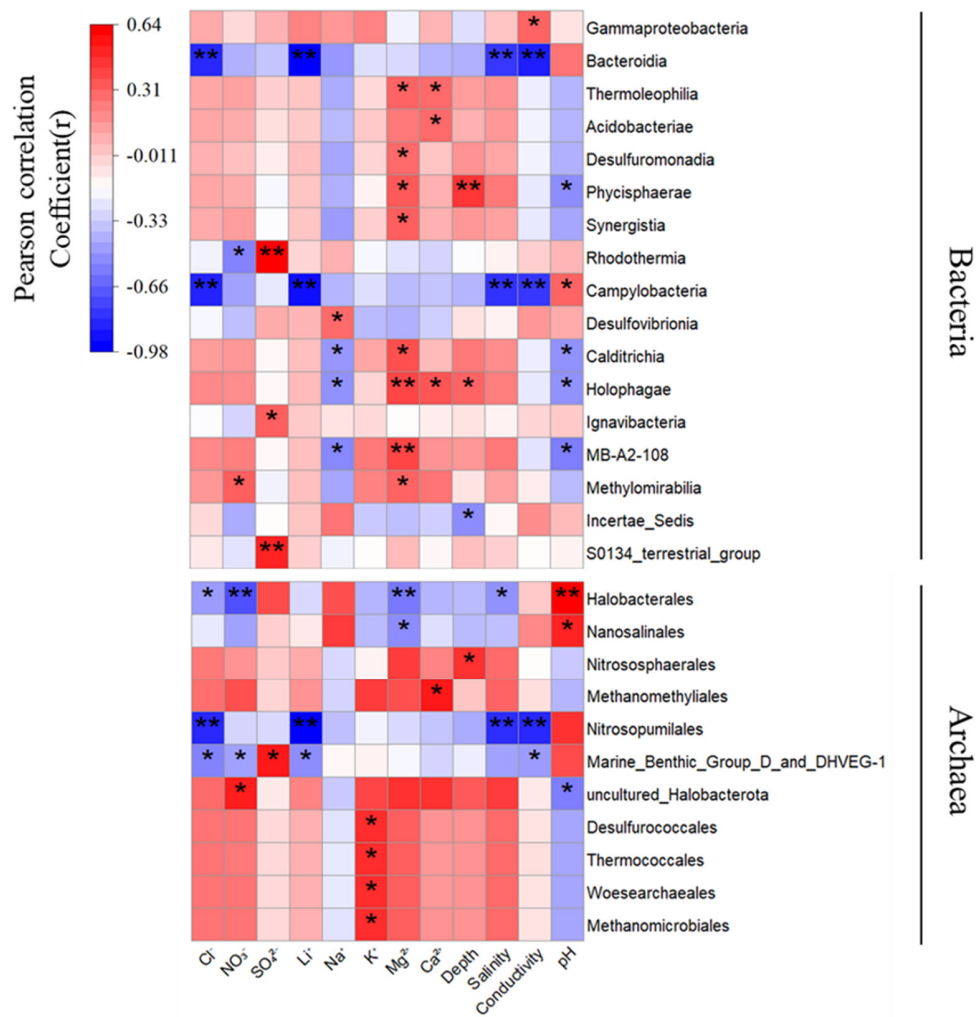

**Figure S4.** Heatmap of values of Pearson's correlation between species and environmental factors. The heatmap shows the species of bacteria at class level with relative abundance greater than 0.2 % and archaea at order level that are significantly associated with any environmental factor. Lines represent different microbial groups, columns represent different environmental factors. The color of the color block represents the correlation coefficient (r), and red indicates positive correlation, blue negative correlation. If the p value of the correlation between an environmental factor and the abundance of a species is less than 0.05, one star number "\*" is marked in the corresponding color block, indicating significant indigenous correlation. If the  $p \leq 0.01$ , two-star numbers "\*\*" are marked, indicating extremely significant indigenous correlation.
